# Supplementary material for: Nutrition in primary and secondary prevention of cardiovascular risk in the continental and Mediterranean regions of Croatia
Source: PubMed Central journal article supplement (PMC5603055; doi:10.1186/s12872-017-0678-z), 2017-09-16
Supplement: 12872_2017_678_MOESM1_ESM.pdf [file 12872_2017_678_MOESM1_ESM.pdf]

# Laboratory findings:

|                                             |                                                                                |
|---------------------------------------------|--------------------------------------------------------------------------------|
| <b>Date and time:</b><br>□□ □□□□ □□□□ □□:□□ | <b>Fasting:</b><br><input type="checkbox"/> yes<br><input type="checkbox"/> no |
|---------------------------------------------|--------------------------------------------------------------------------------|

|                                             |                                               |
|---------------------------------------------|-----------------------------------------------|
| <b>Lab value:</b>                           |                                               |
| <b>Glucose:</b> □□ □□ . □□ □□ mmol/L        | <b>CRP:</b> □□ □□ . □□ □□ mg/L                |
| <b>Cholesterol:</b><br>□□ □□ □□ □□ . mmol/L | <b>Triglycerides:</b><br>□□ □□ □□ □□ . mmol/L |
| <b>HDL:</b><br>□□ □□ . □□ □□ mmol/L         | <b>LDL:</b><br>□□ □□ . □□ □□ mmol/L           |

# Physical findings:

|                                             |
|---------------------------------------------|
| <b>Date and time:</b><br>□□ □□□□ □□□□ □□:□□ |
|---------------------------------------------|

|                            |                            |
|----------------------------|----------------------------|
| <b>Weight:</b> □□ □□ □□ kg | <b>Height:</b> □□ □□ □□ cm |
|----------------------------|----------------------------|

**Waist circumference:** □□□ . □□ cm

**Hip circumference:** □□□ . □□ cm

**Blood pressure:**      **Pulse:** □□□ beats/min

**First measurement:**      **Left hand:** □□□/□□□ mmHg

**Right hand:** □□□/□□□ mmHg

**Second measurement:** **Left hand:** □□□/□□□ mmHg

**Right hand:** □□□/□□□ mmHg

## Diet habits:

Are you a vegetarian?       YES     NO

How often do you eat food from these categories?

|                                  | Choose one answer        |                          |                          |                          | If chosen monthly or weakly, how often |
|----------------------------------|--------------------------|--------------------------|--------------------------|--------------------------|----------------------------------------|
|                                  | < 1x monthly or never    | monthly                  | weekly                   | daily                    |                                        |
| Red meat                         | <input type="checkbox"/> | <input type="checkbox"/> | <input type="checkbox"/> | <input type="checkbox"/> |                                        |
| Cured meat products              | <input type="checkbox"/> | <input type="checkbox"/> | <input type="checkbox"/> | <input type="checkbox"/> |                                        |
| Poultry                          | <input type="checkbox"/> | <input type="checkbox"/> | <input type="checkbox"/> | <input type="checkbox"/> |                                        |
| Fish                             | <input type="checkbox"/> | <input type="checkbox"/> | <input type="checkbox"/> | <input type="checkbox"/> |                                        |
| Eggs                             | <input type="checkbox"/> | <input type="checkbox"/> | <input type="checkbox"/> | <input type="checkbox"/> |                                        |
| Whole grains                     | <input type="checkbox"/> | <input type="checkbox"/> | <input type="checkbox"/> | <input type="checkbox"/> |                                        |
| Rafined grains                   | <input type="checkbox"/> | <input type="checkbox"/> | <input type="checkbox"/> | <input type="checkbox"/> |                                        |
| Dairy products                   | <input type="checkbox"/> | <input type="checkbox"/> | <input type="checkbox"/> | <input type="checkbox"/> |                                        |
| Fried and breaded food           | <input type="checkbox"/> | <input type="checkbox"/> | <input type="checkbox"/> | <input type="checkbox"/> |                                        |
| Soy-based food                   | <input type="checkbox"/> | <input type="checkbox"/> | <input type="checkbox"/> | <input type="checkbox"/> |                                        |
| Salty food and snacks            | <input type="checkbox"/> | <input type="checkbox"/> | <input type="checkbox"/> | <input type="checkbox"/> |                                        |
| Sweets                           | <input type="checkbox"/> | <input type="checkbox"/> | <input type="checkbox"/> | <input type="checkbox"/> |                                        |
| Salt                             | <input type="checkbox"/> | <input type="checkbox"/> | <input type="checkbox"/> | <input type="checkbox"/> |                                        |
| Fruits                           | <input type="checkbox"/> | <input type="checkbox"/> | <input type="checkbox"/> | <input type="checkbox"/> |                                        |
| Juices                           | <input type="checkbox"/> | <input type="checkbox"/> | <input type="checkbox"/> | <input type="checkbox"/> |                                        |
| Nuts                             | <input type="checkbox"/> | <input type="checkbox"/> | <input type="checkbox"/> | <input type="checkbox"/> |                                        |
| Beans                            | <input type="checkbox"/> | <input type="checkbox"/> | <input type="checkbox"/> | <input type="checkbox"/> |                                        |
| Potatoes                         | <input type="checkbox"/> | <input type="checkbox"/> | <input type="checkbox"/> | <input type="checkbox"/> |                                        |
| Green leafy vegetables           | <input type="checkbox"/> | <input type="checkbox"/> | <input type="checkbox"/> | <input type="checkbox"/> |                                        |
| Pickled vegetables               | <input type="checkbox"/> | <input type="checkbox"/> | <input type="checkbox"/> | <input type="checkbox"/> |                                        |
| Other vegetables (cooked or raw) | <input type="checkbox"/> | <input type="checkbox"/> | <input type="checkbox"/> | <input type="checkbox"/> |                                        |
| Sweetened beverages              | <input type="checkbox"/> | <input type="checkbox"/> | <input type="checkbox"/> | <input type="checkbox"/> |                                        |
| Olive oil                        | <input type="checkbox"/> | <input type="checkbox"/> | <input type="checkbox"/> | <input type="checkbox"/> |                                        |
| Other vegetable oils             | <input type="checkbox"/> | <input type="checkbox"/> | <input type="checkbox"/> | <input type="checkbox"/> |                                        |
| Animal fats                      | <input type="checkbox"/> | <input type="checkbox"/> | <input type="checkbox"/> | <input type="checkbox"/> |                                        |
| Untreated filtered coffee        | <input type="checkbox"/> | <input type="checkbox"/> | <input type="checkbox"/> | <input type="checkbox"/> |                                        |

## Smoking habits:

Have you ever used any of these tobacco products?

|            | Never                    | Before                   | Duration | Now                      | No per day |
|------------|--------------------------|--------------------------|----------|--------------------------|------------|
| Cigarettes | <input type="checkbox"/> | <input type="checkbox"/> |          | <input type="checkbox"/> |            |

|                           |                          |                          |  |                          |  |
|---------------------------|--------------------------|--------------------------|--|--------------------------|--|
| <b>Ciags/tobacco pipe</b> | <input type="checkbox"/> | <input type="checkbox"/> |  | <input type="checkbox"/> |  |
| <b>Chewing tobacco</b>    | <input type="checkbox"/> | <input type="checkbox"/> |  | <input type="checkbox"/> |  |
| <b>Other:</b> _____       |                          |                          |  |                          |  |
